# Supplementary material
Source: Springer Nature journal article supplement (https://www.springermedizin.de/resource/supplementary/13006_2012_159_MOESM1_ESM.pdf/9628146)
Supplement: MOESM1 [file 9628146]

Socio – demographic and economic risk factors (Level I):

- Parental socio- demographic characteristics,
- Socio economic position.(wealth index) ,
- Child care practices in mother’s absence
- Others

Maternal related risk factors (Level II):

- Maternal food security status
- Maternal & child health care practices
- Maternal reproductive health constructs
- Maternal knowledge of infant and young child feeding practices

Child related risk factors (Level III):

- Child’s sex and age
- Birth weight
- Child ‘s vaccination status
- Other child care practices

Exclusive Breast Feeding

Figure 1: Conceptual hierarchal frame work of risk factors for exclusive breast feeding
